# Supplementary material
Source: Royal Society of Chemistry journal article supplement (doi:10.1039/d6nr01480a)
Supplement: d6nr01480a1.pdf [file d6nr01480a1.pdf]

## Supplementary Information

### **Divergent Phase Evolution in Mixed Oxide $W_{0.5}Mo_{0.5}O_3$ under Electron Beam Irradiation and Thermal Annealing**

**Naveen Goyal**<sup>a, b, \*</sup>, **Johannes Biskupek**<sup>b</sup>, **Ute Kaiser**<sup>b, c, \*</sup>

<sup>a</sup>Collaborative Research Centre, Technical University Dresden, 01062, Germany

<sup>b</sup>Electron Microscopy Group of Materials Science, University of Ulm, 89081, Germany

<sup>c</sup>Institute of Quantum Optics, University of Ulm, 89081, Germany

\*Corresponding Authors: [naveen.goyal@mailbox.tu-dresden.de](mailto:naveen.goyal@mailbox.tu-dresden.de), [ute.kaiser@uni-ulm.de](mailto:ute.kaiser@uni-ulm.de)

## Computational details

The DFT calculations were performed using Vienna ab-initio simulation package (VASP) by considering spin polarization.<sup>1</sup> Mo<sub>4</sub>O<sub>11</sub> unit cell in orthorhombic crystal system and  $P_{nma}$  space group was taken from materials project database<sup>2</sup> and further, half of the Mo atoms were randomly substituted by W to obtain Mo<sub>2</sub>W<sub>2</sub>O<sub>11</sub>. All electron projector-augmented wave (PAW)<sup>3</sup> pseudopotentials were used to describe the electron-ion interactions, wherein Mo ( $4p^6 4d^5 5s^1$ ), W ( $5p^6 5d^5 6s^1$ ) and O ( $2s^2, 2p^4$ ) shells were treated as valence shells. Electronic exchange and correlation were approximated by Perdew-Burke-Ernzerhof (PBE) functional under generalized gradient approximation (GGA).<sup>4</sup> The structural optimization was performed until the Hellman-Feynman forces acting on each atom were less than 0.01 eV/Å and the energy tolerance was set to 10<sup>-5</sup> eV. The Brillouin zone for optimization of unit cells was sampled using a gamma centred 4x3x1 k-point grid. To account for strongly localized d-orbitals on transition metals, an on-site effective Hubbard (U-J = U<sub>eff</sub>) parameter has been used, as introduced by Dudarev et. al.<sup>5</sup> The U<sub>eff</sub> values for Mo and W were chosen as 4.4 and 6.2 eV, respectively. The formation energies for Mo<sub>4</sub>O<sub>11</sub> and Mo<sub>2</sub>W<sub>2</sub>O<sub>11</sub> were calculated from their optimized structures by using the equation below.

$$E_{formation} = E_{total} - n(Mo) * \mu(Mo) - n(W) * \mu(W) - n(O) * \mu(O)$$

The chemical potentials of Mo, W were calculated from their respective body centered cubic unit cells. The chemical potential for oxygen atoms was calculated as 1/2  $\mu$  (O<sub>2</sub> (g)).

## Supplementary Figures

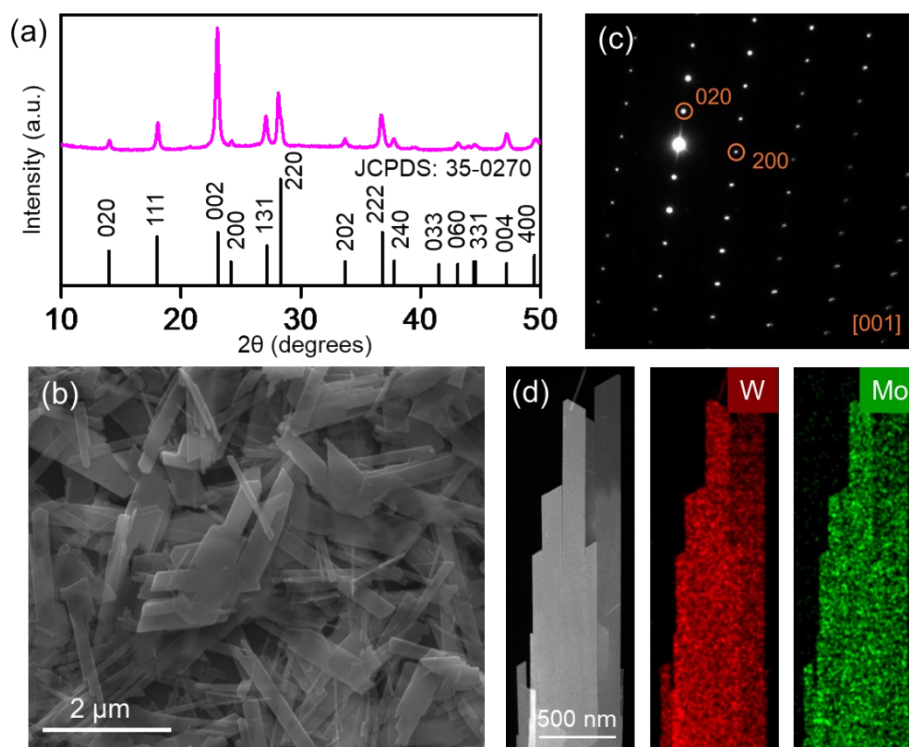

**Fig. S1:** Structural characterization of  $W_{0.5}Mo_{0.5}O_3$ ; **(a)** PXRD pattern matching with orthorhombic phase of mixed metal oxide having composition  $W_{0.5}Mo_{0.5}O_3 \cdot 0.33H_2O$ ; **(b)** SEM micrograph showing uniform belt-shaped morphology; **(c)** SAED pattern along  $[001]$  zone axis depicting single-crystalline nature; **(d)** STEM-EDS mapping showing uniform distribution of W and Mo with atomic fraction of 1:1.

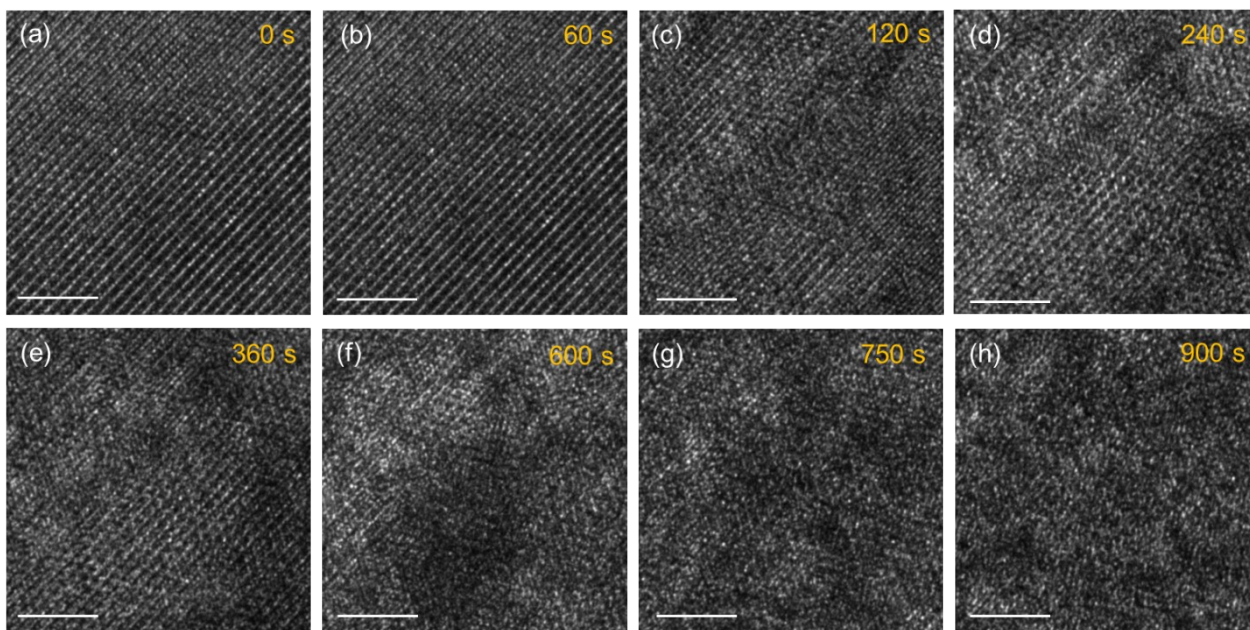

**Fig. S2:** Series of HRTEM images acquired at regular interval of time during electron beam irradiation depicting structural transformations in mixed metal oxide  $W_{0.5}Mo_{0.5}O_3$ ; (Scale bar is 5 nm in all the panels).

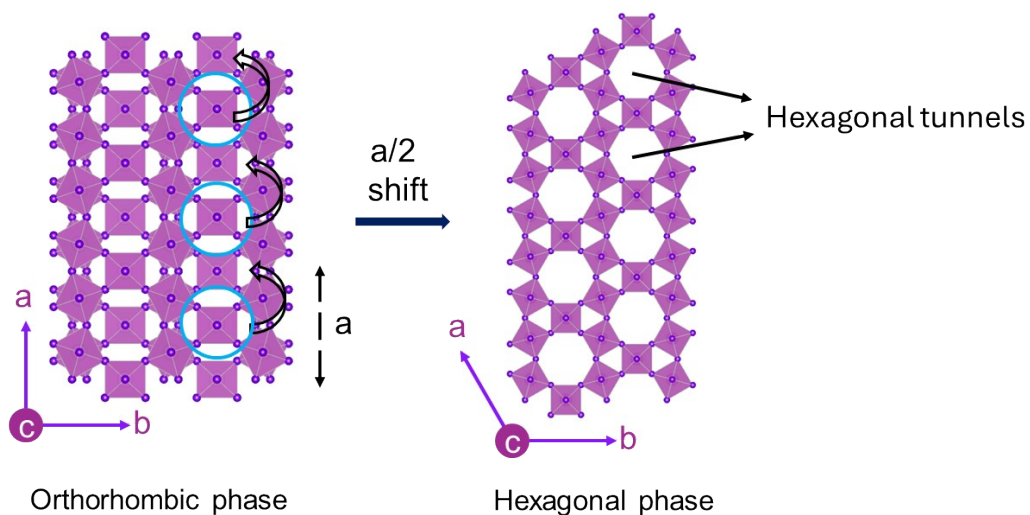

**Fig. S3:** Schematic depicting the plausible mechanism of orthorhombic to hexagonal phase transformation through atomic-model during electron-beam irradiation.

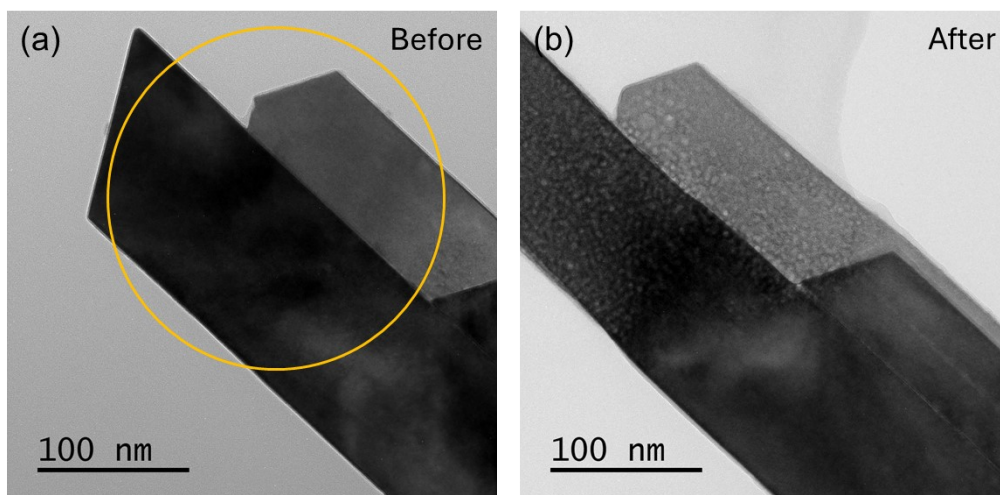

**Fig. S4:** BF-TEM micrograph of the  $\text{Mo}_{0.5}\text{W}_{0.5}\text{O}_3$  sample before (a) and after (b) electron beam irradiation experiment, showing structural degradation through continuous exposure of electron beam (enclosed area in yellow circle is area illuminated).

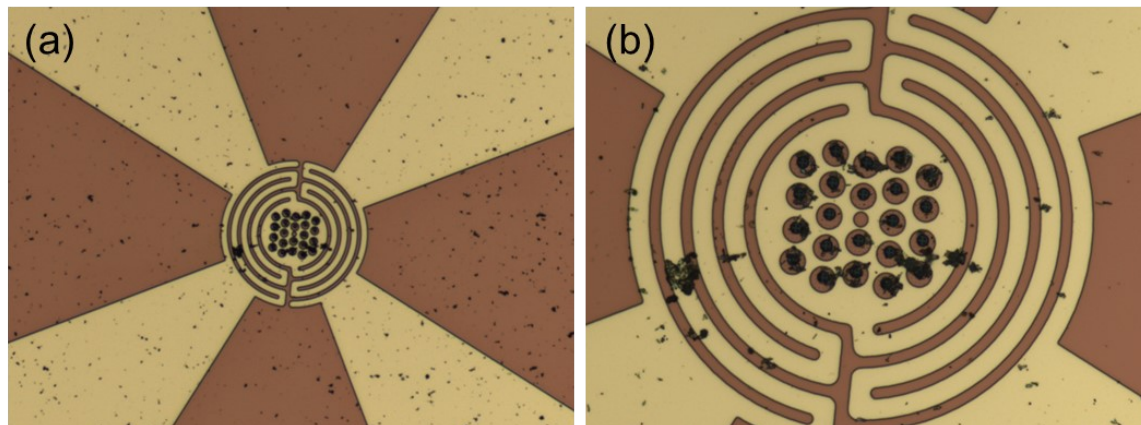

**Fig. S5 (a-b):** Light optical microscope images of  $\text{W}_{0.5}\text{Mo}_{0.5}\text{O}_3$  sample (black contrast) drop casted on the viewing windows of MEMS chip for in-situ heating in TEM.

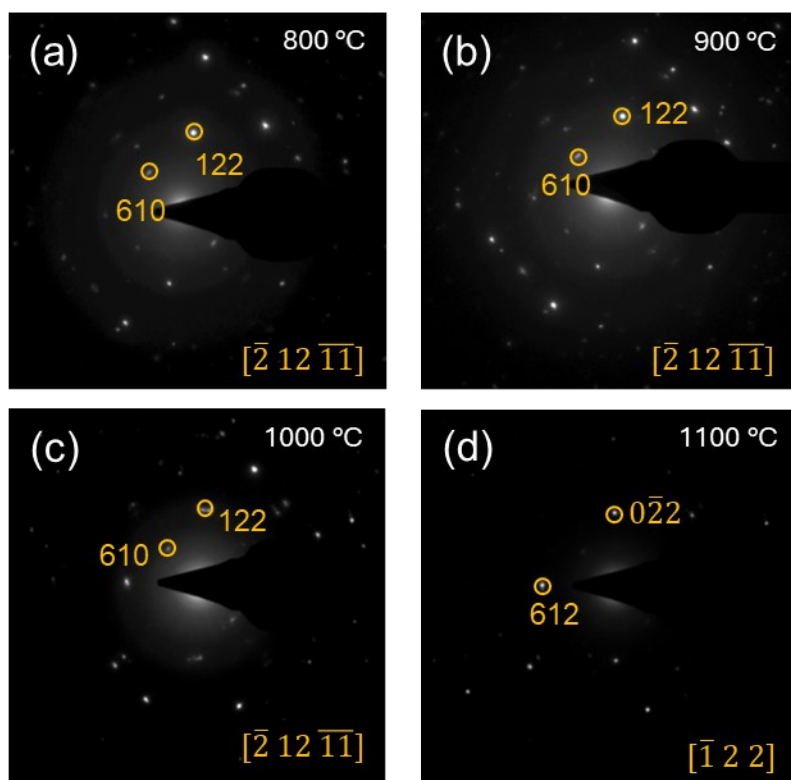

**Fig. S6(a-d):** SAED patterns of the mixed metal oxide taken during in-situ heating experiment after an interval of 100 °C; showcasing the growth of  $\text{Mo}_4\text{O}_{11}$  phase and the maintenance of single crystallinity.

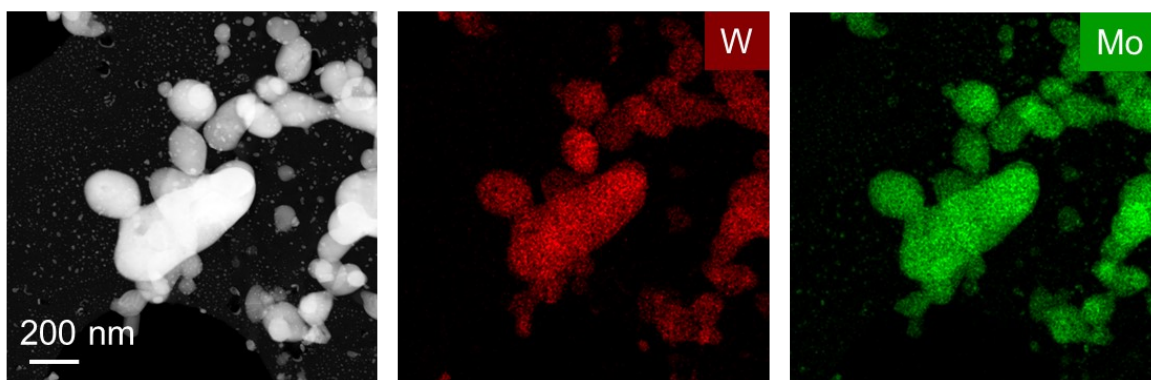

**Fig. S7:** STEM-EDS mapping of mixed metal oxide sample post in-situ TEM heating; showing preservation of uniform distribution of Mo and W even after 1200 °C with atomic fraction of 1:1.

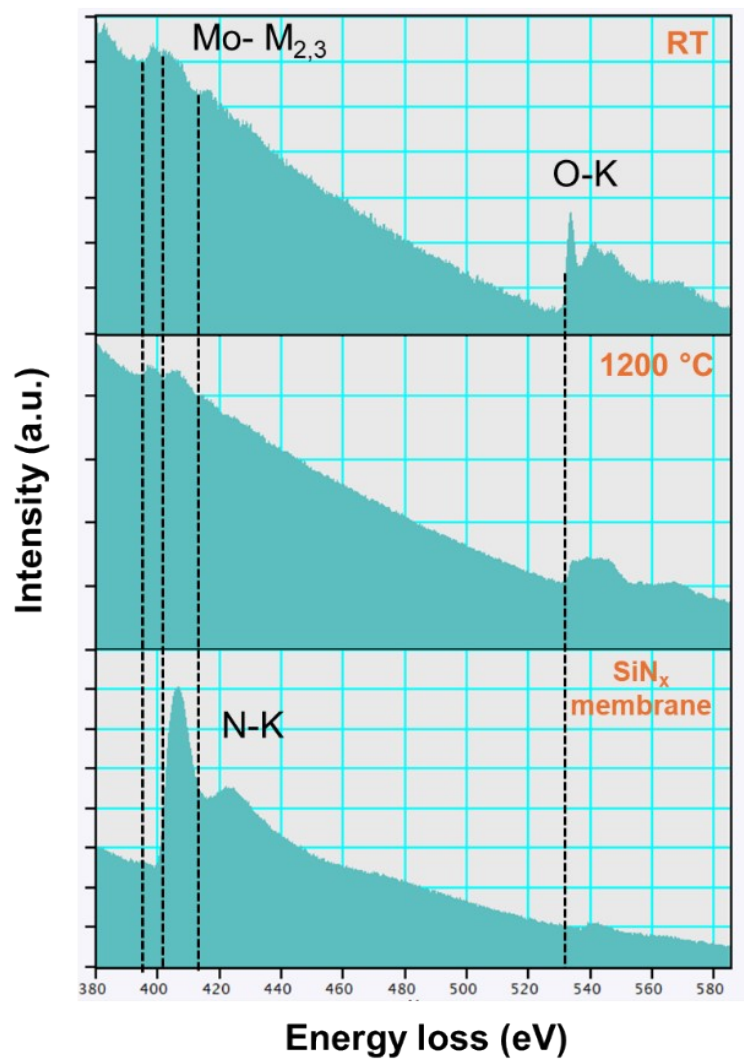

**Fig. S8:** EELS analysis of the sample before and after heating; Raw EELS data acquired in the energy-loss range of 380-580 eV for the sample at RT, 1200°C together with a reference spectrum from an empty SiN<sub>x</sub>-MEMS chip at RT to cover the Mo  $M_{2,3}$ -edge and the O-K edge.

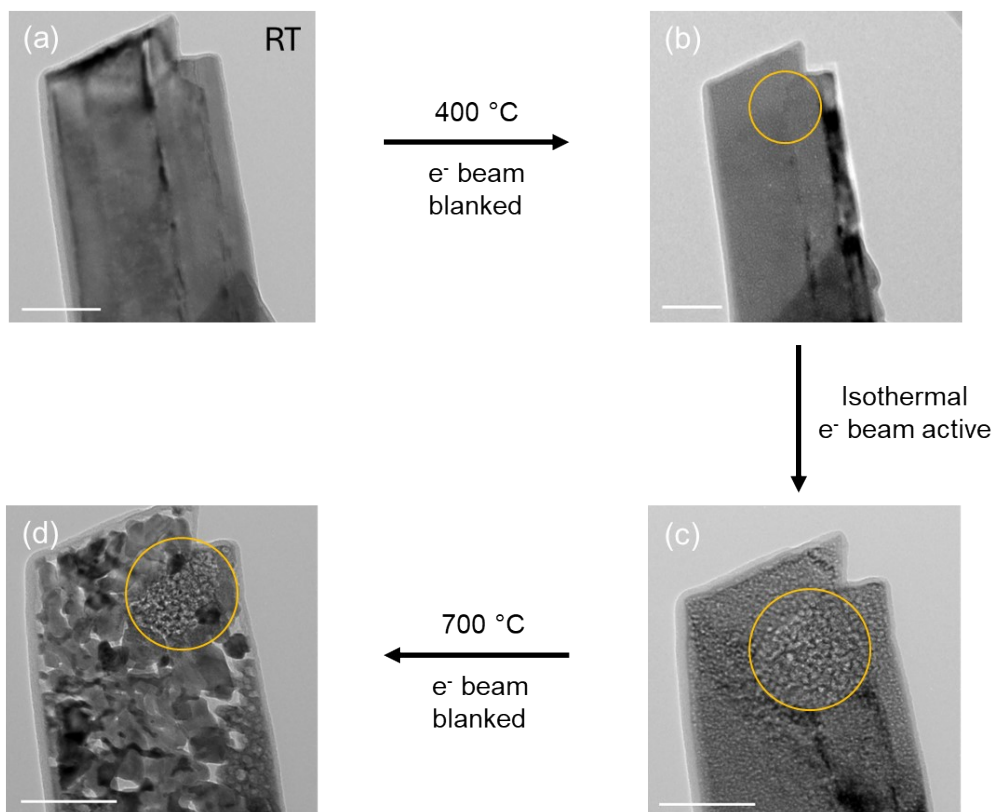

**Fig. S9:** Coupled thermal annealing and electron-beam irradiation effects in a single  $\text{Mo}_{0.5}\text{W}_{0.5}\text{O}_3$  nanobelt; **(a-b)** TEM image acquired before and after 400 °C heating with the electron beam blanked; **(c)** TEM image acquired after 10 min of electron beam irradiation at 400 °C, showing localized structural degradation in the marked region; **(d)** TEM image acquired after further heating to 700 °C with the electron beam again blanked, demonstrating the phase transformation to oxygen-deficient  $\text{Mo}_2\text{W}_2\text{O}_{11}$  throughout the nanobelt except within the previously irradiated region. Scale bar 100 nm in all panels.

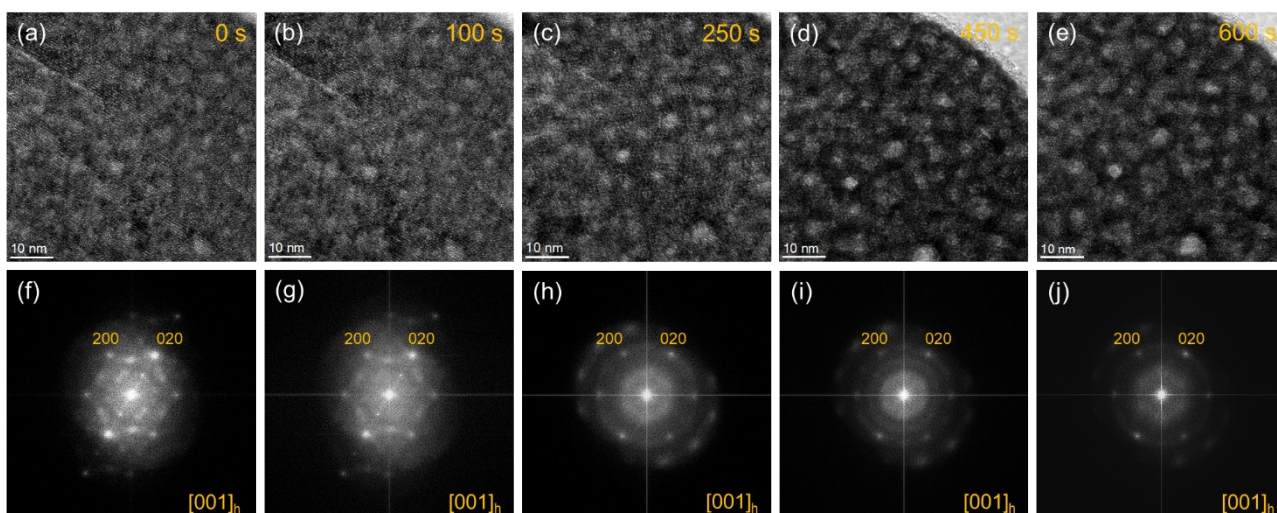

**Fig. S10:** Electron-beam irradiation effects in hexagonal  $W_{0.5}Mo_{0.5}O_3$  formed during in situ thermal annealing at 400 °C under a constant dose rate of  $2.5 \times 10^6 \text{ e}^- \text{ nm}^{-2} \text{ s}^{-1}$ ; **(a-e)** HRTEM images acquired during continuous irradiation. **(f-j)** Corresponding FFTs showing progressive structural degradation, including loss in high-order symmetry and fading of diffraction spots.

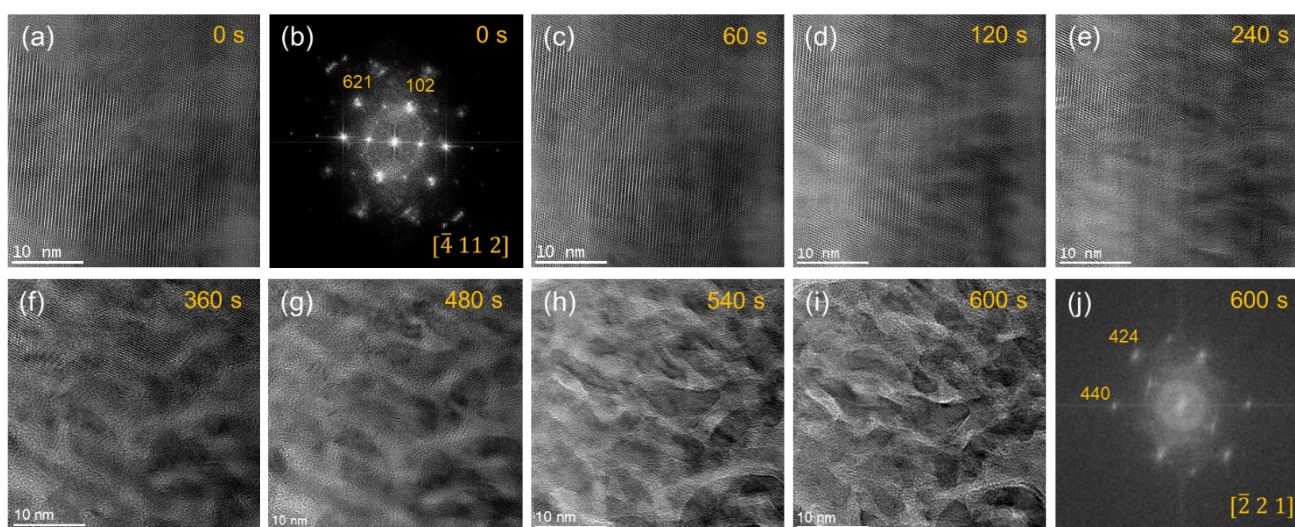

**Fig. S11:** Electron-beam irradiation effects in orthorhombic  $Mo_2W_2O_{11}$  formed during in situ thermal annealing at 700 °C under a constant dose rate of  $4.8 \times 10^6 \text{ e}^- \text{ nm}^{-2} \text{ s}^{-1}$ ; **(a, c-i)** HRTEM images acquired during continuous irradiation. **(b,j)** Corresponding FFTs of (a) and (i), showing reduced crystallinity, loss of high-order symmetry, and fading of diffraction spots following prolonged electron-beam exposure.

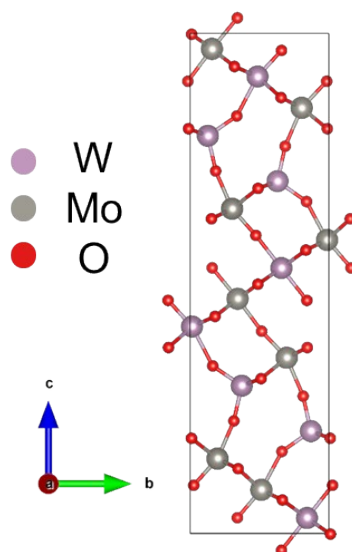

**Fig. S12:** DFT optimized structure model of  $\text{Mo}_2\text{W}_2\text{O}_{11}$  formed by random substitution of half of Mo atoms from  $\text{Mo}_4\text{O}_{11}$  with W atoms.

## References

- 1 G. Kresse and J. Hafner, *Phys. Rev. B*, 1993, **47**, 558–561.
- 2 A. Jain, S. P. Ong, G. Hautier, W. Chen, W. D. Richards, S. Dacek, S. Cholia, D. Gunter, D. Skinner, G. Ceder and K. A. Persson, *APL Mater.*, DOI:10.1063/1.4812323.
- 3 G. Kresse and D. Joubert, *Phys. Rev. B*, 1999, **59**, 1758–1775.
- 4 J. P. Perdew, K. Burke and M. Ernzerhof, *Phys. Rev. Lett.*, 1996, **77**, 3865–3868.
- 5 S. L. Dudarev, G. A. Botton, S. Y. Savrasov, C. J. Humphreys and A. P. Sutton, *Phys. Rev. B*, 1998, **57**, 1505–1509.
